# Supplementary material
Source: Springer Nature journal article supplement (https://www.springermedizin.de/resource/supplementary/12933_2010_257_MOESM2_ESM.pdf/9539956)

# Periods of treatment duration

Delta HDL-C level from baseline

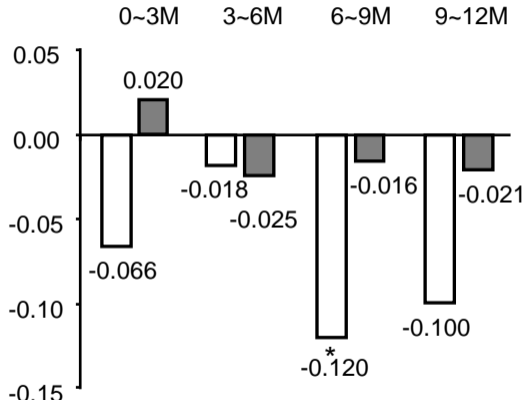

Female  
Male

Supplement: MOESM2 [file 9539956]
